# Supplementary material for: A ratiometric luminescence pH sensor based on YAG:V3+,V5+ nanoparticles
Source: Royal Society of Chemistry journal article supplement (doi:10.1039/d2nj01595a), 2022-01-01
Supplement: d2nj01595a1.pdf [file d2nj01595a1.pdf]

## Supporting Information

### The ratiometric luminescence pH sensor based on YAG:V<sup>3+</sup>,V<sup>5+</sup> nanoparticles

K. Kniec<sup>1\*</sup>, L. Marciniak<sup>1\*</sup>

<sup>1</sup>Institute of Low Temperature and Structure Research, Polish Academy of Sciences, Okólna 2, 50-422 Wrocław, Poland

\* corresponding author: [k.kniec@intibs.pl](mailto:k.kniec@intibs.pl), [l.marciniak@intibs.pl](mailto:l.marciniak@intibs.pl)

KEYWORDS pH, pH indicator, luminescence, nanocrystals, vanadium, optical pH sensors

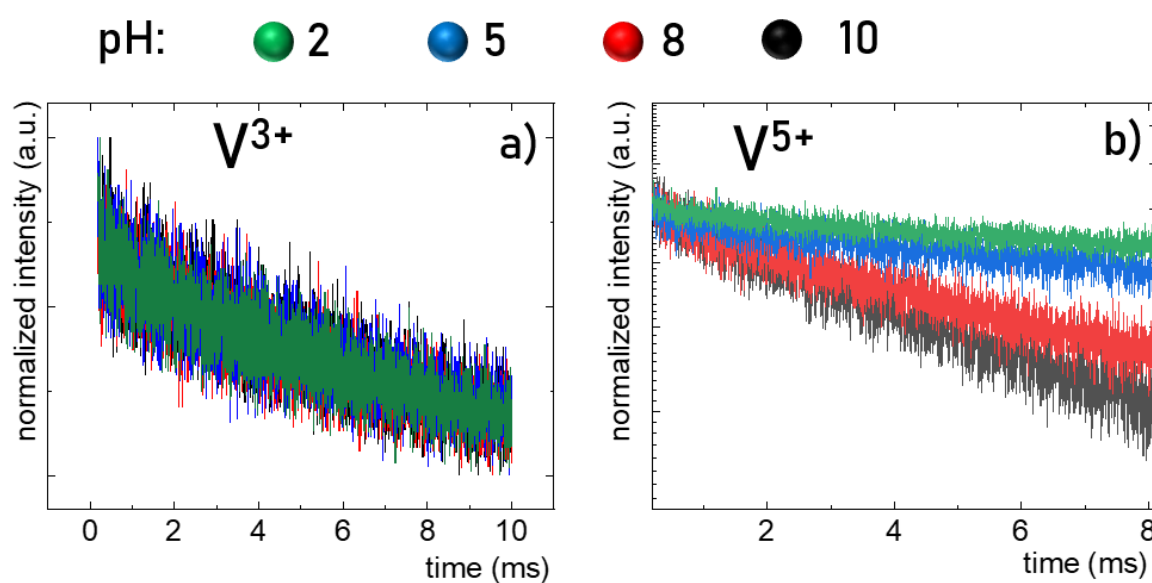

**Figure S1.** The kinetics of the luminescence of V<sup>3+</sup> -a) and V<sup>5+</sup> -b) as a function of pH upon  $\lambda_{\text{exc}}=266$  nm.

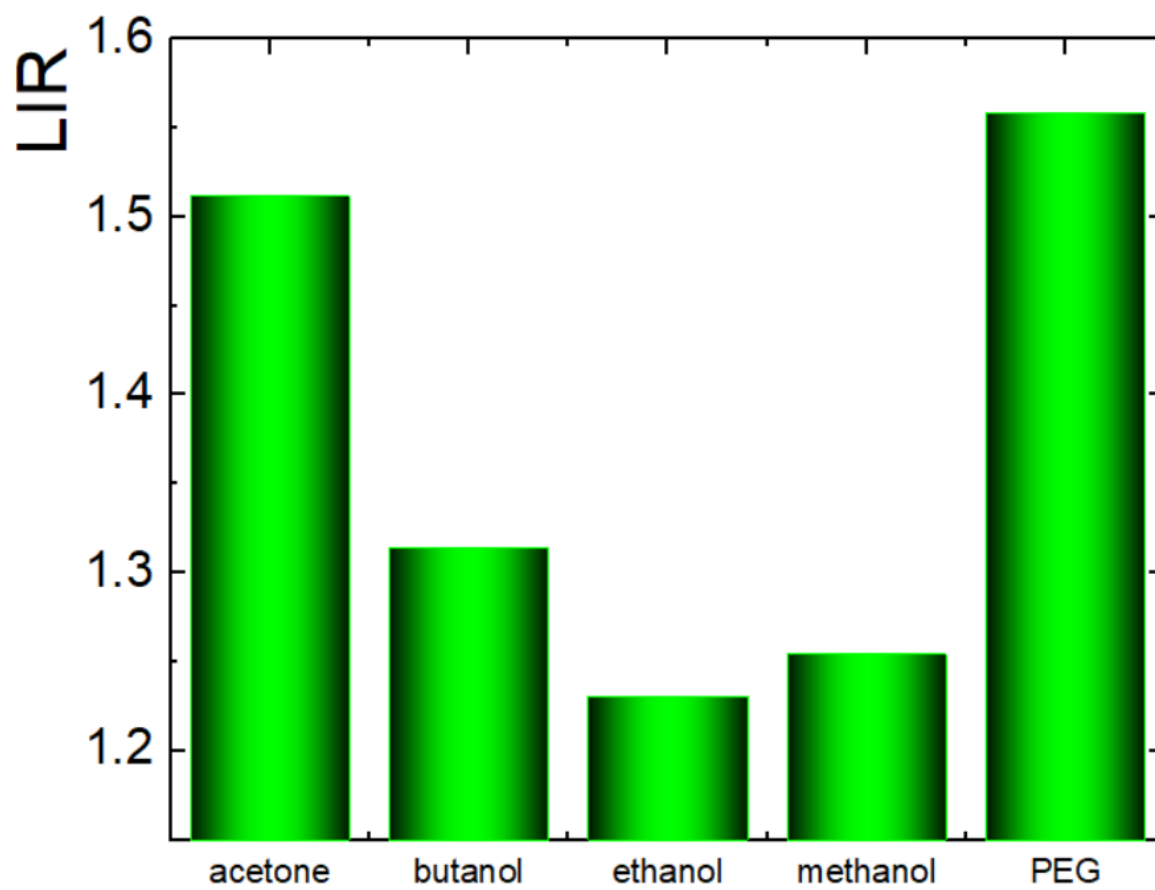

**Figure S2.** Comparison of the LIR measured for different solvent.
